# Supplementary material
Source: PubMed Central journal article supplement (PMC139237)
Supplement: pnas_99_26_16875__15.pdf [file pnas_99_26_16875__15.pdf]

**Table 8. Top liquid-association pairs (LAPs) of AVT4 (YNL101W)**

| Top 10 positive LAPs scouted by AVT4 | Top 11-20 positive LAPs scouted by AVT4 | Top 10 negative LAPs scouted by AVT4 | Top 11-20 negative LAPs scouted by AVT4 |
|--------------------------------------|-----------------------------------------|--------------------------------------|-----------------------------------------|
| RPD3<br>TIF5                         | IMP4<br>RPD3                            | AUT7<br>CLC1                         | YKL091C<br>YNL100W                      |
| PDX1<br>YOR146W                      | PDX1<br>YLR002C                         | YPT52<br>GSY1                        | PDX1<br>YKL091C                         |
| RMT2<br>PDX1                         | YIL088C<br>NIP7                         | AUT7<br>YNL100W                      | SDS24<br>YDR199W                        |
| PDX1<br>NOP2                         | MAK5<br>PDX1                            | SRV2<br>GLC3                         | YLR149C<br>PUP1                         |
| YBR267W<br>PDX1                      | HRT2<br>YNL114C                         | AUT7<br>GLO1                         | AUT7<br>SRV2                            |
| RPD3<br>YOR146W                      | YIL088C<br>YNL114C                      | YGL161C<br>PRE6                      | RPT6<br>AYR1                            |
| PDX1<br>YNL022C                      | PDX1<br>IMP4                            | AUT7<br>YPL087W                      | ARC19<br>YNL100W                        |
| YMR134W<br>YNL114C                   | RRP3<br>RPD3                            | AUT7<br>UBP2                         | PDX1<br>YLR149C                         |
| YNL022C<br>RPD3                      | PRE6<br>YOR146W                         | PDX1<br>TPS1                         | IKS1<br>RPD3                            |
| YJR071W<br>RPD3                      | HRT2<br>ALR1                            | CLC1<br>YKL091C                      | TPS1<br>PRE6                            |

The newly identified role of *AVT4* in efflux of tyrosine and other large neutral amino acids helps explain the appearance of several genes involved in autophagy, protein degradation, and transport, colored in red, among the top 20 negative LAPs of *AVT4*. Somewhat unexpectedly, *PDX1* appears 11 times.

AUT7 ESSENTIAL FOR AUTOPHAGY  
 PRE6 20S PROTEASOME SUBUNIT ALPHA4  
 PUP1 20S PROTEASOME SUBUNIT BETA2  
 RPT6 26S PROTEASOME REGULATORY SUBUNIT  
 UBP2 UBIQUITIN SPECIFIC PROTEINASE  
 CLC1 CLATHRIN LIGHT CHAIN

YPT52 GTP BINDING PROTEIN OF THE RAB FAMILY

AYR1 1-ACYLDIHYDROXYACETONE PHOSPHATE REDUCTASE; localized in ER and lip particles

PDX1 PYRUVATE DEHYDROGENASE COMPLEX PROTEIN X

RPD3 HISTONE DEACETYLASE B

RRP3 REQUIRED FOR MATURATION OF THE 35S PRIMARY TRANSCRIPT

IMP4 COMPONENT OF THE U3 SMALL NUCLEOLAR RIBONUCLEOPROTEIN

HRT2 HIGH LEVEL EXPRESSION REDUCED TY3 TRANSPOSITION

MAK5 ATP DEPENDENT RNA HELICASE

NIP7 REQUIRED FOR EFFICIENT 60S RIBOSOME SUBUNIT BIOGENESIS

NOP2 NUCLEOLAR PROTEIN

RMT2 N DELTA ARGININE METHYLTRANSFERASE

TIF5 TRANSLATION INITIATION FACTOR EIF5

GSY1 UDP GLUCOSE -STARCH GLUCOSYLTRANSFERASE ISOFORM 1

GLC3 1-4-GLUCAN BRANCHING ENZYME, GLYCOGEN BRANCHING ENZYME\*

TPS1 ALPHA ALPHA TREHALOSE PHOSPHATE SYNTHASE 56-kDa SUBUNIT

GLO1 GLYOXALASE I

SDS24 STRONG SIMILARITY TO HYPOTHETICAL PROTEIN YGL056C

SRV2 ADENYLATE CYCLASE ASSOCIATED PROTEIN 70 kDa

ARC19 SUBUNIT OF THE ARP2/3 COMPLEX

IKS1 IRA1-KINASE SUPPRESSOR

ALR1 DIVALENT CATION TRANSPORTER

AUT7 ESSENTIAL FOR AUTOPHAGY

PRE6 20S PROTEASOME SUBUNIT ALPHA4

PUP1 20S PROTEASOME SUBUNIT BETA2

RPT6 26S PROTEASOME REGULATORY SUBUNIT

UBP2 UBIQUITIN SPECIFIC PROTEINASE

CLC1 CLATHRIN LIGHT CHAIN

YPT52 GTP BINDING PROTEIN OF THE RAB FAMILY

AYR1 1-ACYLDIHYDROXYACETONE PHOSPHATE REDUCTASE; localized in ER and lip particles

PDX1 PYRUVATE DEHYDROGENASE COMPLEX PROTEIN X

RPD3 HISTONE DEACETYLASE B

RRP3 REQUIRED FOR MATURATION OF THE 35S PRIMARY TRANSCRIPT

IMP4 COMPONENT OF THE U3 SMALL NUCLEOLAR RIBONUCLEOPROTEIN

HRT2 HIGH LEVEL EXPRESSION REDUCED TY3 TRANSPOSITION

MAK5 ATP DEPENDENT RNA HELICASE

NIP7 REQUIRED FOR EFFICIENT 60S RIBOSOME SUBUNIT BIOGENESIS

NOP2 NUCLEOLAR PROTEIN

RMT2 N DELTA ARGININE METHYLTRANSFERASE

TIF5 TRANSLATION INITIATION FACTOR EIF5

GSY1 UDP GLUCOSE -STARCH GLUCOSYLTRANSFERASE ISOFORM 1

GLC3 1-4-GLUCAN BRANCHING ENZYME, GLYCOGEN BRANCHING ENZYME\*

TPS1 ALPHA ALPHA TREHALOSE PHOSPHATE SYNTHASE 56-kDa SUBUNIT

GLO1 GLYOXALASE I

SDS24 STRONG SIMILARITY TO HYPOTHETICAL PROTEIN YGL056C

SRV2 ADENYLATE CYCLASE ASSOCIATED PROTEIN 70 kDa

ARC19 SUBUNIT OF THE ARP2/3 COMPLEX

IKS1 IRA1-KINASE SUPPRESSOR

ALR1 DIVALENT CATION TRANSPORTER
